# Supplementary material for: Reproducible Results Policy
Source: Atypon-hosted journal article supplement (doi:10.1061/(asce)wr.1943-5452.0001368), 2020-11-30
Supplement: supplemental_materials_wr.1943-5452.0001368_rosenberg.pdf [file supplemental_materials_wr.1943-5452.0001368_rosenberg.pdf]

# SUPPLEMENTAL MATERIALS

*ASCE Journal of Water Resources Planning and Management*

## Reproducible Results Policy

David E. Rosenberg, Amber Spackman Jones, Yves Filion,  
Rebecca Teasley, Samuel Sandoval-Solis, James H. Stagge,  
Adel Abdallah, Anthony Castronova, Avi Ostfeld, and  
David Watkins Jr.

**DOI:** 10.1061/(ASCE)WR.1943-5452.0001368

© ASCE 2020

[www.ascelibrary.org](http://www.ascelibrary.org)

## Worksheet to Assess Result Reproducibility of Manuscripts

Use this worksheet to assess the A) availability of manuscript data, models, code, directions, and other digital artifacts, and B) reproducibility of figures, tables, and other results presented in the manuscript. Should you answer “no” or “not sure” to any question, skip to Section IV and then answer the final questions to provide the authors constructive feedback to improve their repository and materials. The journal asks that associate editors for reproducibility (AERs) and reproducibility reviewers take no more than two working days to assess the reproducibility of a manuscript’s results. Should an assessment take longer, skip to Section IV and provide the authors feedback on the steps that took a long time and how the authors can better organize their repository and materials to reduce the time to assess result reproducibility.

### Part I. Manuscript Information

|                |  |
|----------------|--|
| Authors:       |  |
| Manuscript ID: |  |

### Part II. Availability of Data, Models, Code, Directions, and Other Digital Artifacts Used to Generate Results

|                                                                                                                                                                                                                                                                                    |
|------------------------------------------------------------------------------------------------------------------------------------------------------------------------------------------------------------------------------------------------------------------------------------|
| 1. Are all data, models, code, directions, and other materials listed in the online portion of the Data Availability Statement publicly accessible at the stated location(s)? YES NO                                                                                               |
|                                                                                                                                                                                                                                                                                    |
| 2. Will you be able to use the online materials (data, models, code, and directions) listed in the Data Availability Statement to reproduce manuscript results (figures, tables, and other results)?<br>YES NO Not sure I’m not familiar with the required computational resources |
|                                                                                                                                                                                                                                                                                    |

**Part III. Reproducibility of Results (Figures, Tables, and Other Results)**

3. What results did you reproduce? If you could not reproduce a result, please explain in the final column why your effort failed (e.g., unclear directions, results differed, did not generate results, hardware/software error, other). Add rows as needed.

| <b>Result Item</b> | <b>Yes</b> | <b>No</b> | <b>Not Applicable</b> | <b>If No, why did your effort fail?</b> |
|--------------------|------------|-----------|-----------------------|-----------------------------------------|
| Figure 1           |            |           |                       |                                         |
| Figure 2           |            |           |                       |                                         |
| Figure 3           |            |           |                       |                                         |
| Figure 4           |            |           |                       |                                         |
|                    |            |           |                       |                                         |
| Table 1            |            |           |                       |                                         |
| Table 2            |            |           |                       |                                         |
| Table 3            |            |           |                       |                                         |
| Table 4            |            |           |                       |                                         |
|                    |            |           |                       |                                         |
| Text statement:    |            |           |                       |                                         |
| Text statement:    |            |           |                       |                                         |
|                    |            |           |                       |                                         |
| Other:             |            |           |                       |                                         |

#### Part IV. Final Questions and Recommendation

|                                                                                                                                                                                                                                                          |
|----------------------------------------------------------------------------------------------------------------------------------------------------------------------------------------------------------------------------------------------------------|
| 4. In organizing their repository and materials, what practices did the authors do well that others should follow?                                                                                                                                       |
|                                                                                                                                                                                                                                                          |
| 5. How can the repository and materials be improved?                                                                                                                                                                                                     |
|                                                                                                                                                                                                                                                          |
| 6. Other feedback for the authors                                                                                                                                                                                                                        |
|                                                                                                                                                                                                                                                          |
| 7. How many hours did you spend assessing the reproducibility of this work?                                                                                                                                                                              |
|                                                                                                                                                                                                                                                          |
| 8. Recommendation                                                                                                                                                                                                                                        |
| <input type="checkbox"/> Accept the manuscript's reproducible results section with the following additional statement (e.g., <i>Amber Spackman Jones (Associate Editor for Reproducibility) ran all scripts and reproduced all tables and figures</i> ): |
| <input type="checkbox"/> Encourage the authors to revise their repository and materials                                                                                                                                                                  |
| <input type="checkbox"/> Remove the reproducible results section from the manuscript                                                                                                                                                                     |
